# Supplementary material for: Seizure Detection: A Low Computational Effective Approach without Classification Methods
Source: MDPI journal article supplement (doi:10.3390/s22218444), 2022-11-03
Supplement: s1 [file s1]

### Steps to correctly execute our code

- 1) Unzip the content of the zipped file into a folder accessible to MATLAB
- 2) Open the script "process\_all\_chs.m"
- 3) Select the file to process at line 13, see comments lines 9-11 for included files
  - a. The software runs correctly for the entire dataset  
<https://physionet.org/content/chbmit/1.0.0/>  
However, other files not included in the examples need to be manually downloaded
- 4) Execute the script "process\_all\_chs.m"
- 5) If the algorithm does not detect a seizure it displays "No seizures detected..." and the result figure will have a flat line on zero. If a seizure is detected its duration will be marked by the value of one on the plot, the algorithm will display "Seizures detected..."
